# Supplementary material for: Evaluation of Tomato Germplasm against Tomato Brown Rugose Fruit Virus and Identification of Resistance in Solanum pimpinellifolium
Source: Preprints.org preprint supplement (doi:10.20944/preprints202401.0785.v1), 2024-01-10
Supplement: Supplementary file 1 [file supplementary]

## Sheet: Table S2_PI.line
Supplementary Table S2. Screening the USDA tomato core germplasm collections for resistance to ToBRFV
Sample#	Plant ID	Plant Name	Taxonomy	No. of plants scored	Severity rating scale	Disease severity index (%)
1	PI 110595	No Known Plant ID	Solanum pimpinellifolium	9	2	40
2	PI 112215	7404-A	Solanum pimpinellifolium	10	4	80
3	PI 112835	No Known Plant ID	Solanum subsect. lycopersicon hybr.	10	3	60
4	PI 118403	No Known Plant ID	Solanum subsect. lycopersicon hybr.	8	2	40
5	PI 118405	No Known Plant ID	Solanum subsect. lycopersicon hybr.	11	4	80
6	PI 118409	No Known Plant ID	Solanum subsect. lycopersicon hybr.	8	3	60
7	PI 118786	Jobo	Solanum subsect. lycopersicon hybr.	9	3	60
8	PI 119104	Perfeicao	Solanum subsect. lycopersicon hybr.	8	4	80
9	PI 119214	No Known Plant ID	Solanum subsect. lycopersicon hybr.	8	4	80
10	PI 124039	No Known Plant ID	Solanum pimpinellifolium	5	1	20
11	PI 124132	2504	Solanum subsect. lycopersicon hybr.	6	5	100
12	PI 126431	5	Solanum peruvianum	8	5	100
13	PI 126432	6	Solanum pimpinellifolium	9	4	80
14	PI 126433	7	Solanum pimpinellifolium	9	4	80
15	PI 126434	30	Solanum corneliomulleri	7	3	60
16	PI 126435	31	Solanum peruvianum	6	4	80
17	PI 126436	9	Solanum pimpinellifolium	6	4	80
18	PI 126437	10	Solanum subsect. lycopersicon hybr.	8	4	80
19	PI 126439	15	Solanum peruvianum	6	3	60
20	PI 126440	16	Solanum corneliomulleri	5	2	40
21	PI 126441	17	Solanum peruvianum	7	3	60
22	PI 126444	20	Solanum peruvianum	9	4	80
23	PI 126445	21	Solanum habrochaites	8	0.88	17.6
24	PI 126446	22	Solanum habrochaites	8	4	80
25	PI 126448	24	Solanum corneliomulleri	10	1	20
26	PI 126449	26	Solanum habrochaites	8	3	60
27	PI 126905	72	Solanum subsect. lycopersicon hybr.	9	4	80
28	PI 126912	119	Solanum subsect. lycopersicon hybr.	7	3	60
29	PI 126915	125	Solanum subsect. lycopersicon hybr.	8	3	60
30	PI 126923	118	Solanum subsect. lycopersicon hybr.	9	4	80
31	PI 126924	76	Solanum pimpinellifolium	10	4	80
32	PI 126925	82	Solanum pimpinellifolium	9	4	80
33	PI 126926	83	Solanum peruvianum	9	3	60
34	PI 126927	84	Solanum pimpinellifolium	9	3	60
35	PI 126928	85	Solanum peruvianum	6	3	60
36	PI 126929	86	Solanum peruvianum	6	4	80
37	PI 126930	Tomate de Culebra	Solanum peruvianum	8	2	40
38	PI 126932	94	Solanum pimpinellifolium	8	4	80
39	PI 126933	95	Solanum pimpinellifolium	8	3	60
40	PI 126934	108	Solanum pimpinellifolium	9	4	80
41	PI 126935	111	Solanum peruvianum	5	3	60
42	PI 126936	112	Solanum pimpinellifolium	5	3	60
43	PI 126937	107	Solanum pimpinellifolium	7	4	80
44	PI 126938	106	Solanum pimpinellifolium	8	4	80
45	PI 126939	105	Solanum pimpinellifolium	9	3	60
46	PI 126940	103	Solanum pimpinellifolium	8	3	60
47	PI 126941	102	Solanum pimpinellifolium	9	1	20
48	PI 126943	97	Solanum subsect. lycopersicon hybr.	6	4	80
49	PI 126945	99	Solanum peruvianum	3	2	40
50	PI 126946	100	Solanum peruvianum	1	3	60
51	PI 126947	114	Solanum pimpinellifolium	11	4	80
52	PI 126948	115	Solanum subsect. lycopersicon hybr.	9	3	60
53	PI 126949	75	Solanum subsect. lycopersicon hybr.	9	5	100
54	PI 126951	123	Solanum subsect. lycopersicon hybr.	11	5	100
55	PI 126952	124	Solanum pimpinellifolium	11	3	60
56	PI 126953	127	Solanum pimpinellifolium	9	3	60
57	PI 127799	158	Solanum subsect. lycopersicon hybr.	9	0.89	17.8
58	PI 127805	180	Solanum pimpinellifolium	7	0.71	14.2
59	PI 127806	181	Solanum pimpinellifolium	8	2	40
60	PI 127807	182	Solanum pimpinellifolium	9	2	40
61	PI 127826	135	Solanum habrochaites	7	1	20
62	PI 127828	141	Solanum arcanum	8	5	100
63	PI 127830	161	Solanum peruvianum	10	3	60
64	PI 127832	169	Solanum peruvianum	8	5	100
65	PI 127833	179	Solanum pimpinellifolium	5	1	20
66	PI 128194	No Known Plant ID	Solanum subsect. lycopersicon hybr.	6	5	100
67	PI 128639	534	Solanum pimpinellifolium	6	4	80
68	PI 128643	545	Solanum peruvianum	8	4	80
69	PI 128644	516	Solanum habrochaites	6	2	40
70	PI 128645	475	Solanum peruvianum	7	2	40
71	PI 128646	476	Solanum peruvianum	11	4	80
72	PI 128647	477	Solanum peruvianum	8	3	60
73	PI 128648	478	Solanum peruvianum	8	3	60
74	PI 128649	479	Solanum peruvianum	10	4	80
75	PI 128650	480	Solanum peruvianum	11	3	60
76	PI 128651	481	Solanum peruvianum	9	3	60
77	PI 128652	482	Solanum peruvianum	8	4	80
78	PI 128653	483	Solanum peruvianum	9	4	80
79	PI 128654	484	Solanum peruvianum	11	4	80
80	PI 128655	485	Solanum peruvianum	6	5	100
81	PI 128656	No. 486 and 487	Solanum peruvianum	10	4	80
82	PI 128657	508	Solanum peruvianum	11	4	80
83	PI 128658	509	Solanum peruvianum	10	3	60
84	PI 128659	510	Solanum peruvianum	11	5	100
85	PI 128660	511	Solanum peruvianum	6	2	36.6
86	PI 128661	512	Solanum peruvianum	6	2	26.6
87	PI 128663	514	Solanum peruvianum	8	3	55
88	PI 129021	564	Solanum subsect. lycopersicon hybr.	8	3	65
89	PI 129022	571	Solanum subsect. lycopersicon hybr.	8	3	50
90	PI 129024	573	Solanum subsect. lycopersicon hybr.	8	3	47.6
91	PI 129027	593	Solanum subsect. lycopersicon hybr.	8	5	87.6
92	PI 129028	594	Solanum subsect. lycopersicon hybr.	8	2	27.6
93	PI 129030	606	Solanum subsect. lycopersicon hybr.	8	3	50
94	PI 129062	671	Solanum pimpinellifolium	8	2	27.6
95	PI 129074	688	Solanum subsect. lycopersicon hybr.	8	3	50
96	PI 129089	710	Solanum subsect. lycopersicon hybr.	8	3	52.6
97	PI 129090	711	Solanum subsect. lycopersicon hybr.	8	3	50
98	PI 129108	731	Solanum subsect. lycopersicon hybr.	8	3	65
99	PI 129110	733	Solanum subsect. lycopersicon hybr.	8	5	92.6
100	PI 129112	735	Solanum subsect. lycopersicon hybr.	8	3	50
101	PI 129116	739	Solanum subsect. lycopersicon hybr.	2	2	40
102	PI 129121	744	Solanum subsect. lycopersicon hybr.	7	3	57.2
103	PI 129135	762	Solanum subsect. lycopersicon hybr.	8	2	45
104	PI 129143	548	Solanum subsect. lycopersicon hybr.	8	0	0
105	PI 129144	515	Solanum corneliomulleri	7	0	0
106	PI 129145	537	Solanum peruvianum	6	2	26.6
107	PI 129146	539	Solanum peruvianum	8	2	40
108	PI 129147	561	Solanum peruvianum	8	2	42.6
109	PI 129148	563	Solanum subsect. lycopersicon hybr.	8	2	30
110	PI 129149	579	Solanum peruvianum	8	2	30
111	PI 129151	581	Solanum pimpinellifolium	8	2	42.6
112	PI 129152	582	Solanum peruvianum	8	2	27.6
113	PI 129154	589	Solanum subsect. lycopersicon hybr.	8	3	50
114	PI 129155	591	Solanum subsect. lycopersicon hybr.	8	2	35
115	PI 129156	604	Solanum subsect. lycopersicon hybr.	8	3	50
116	PI 129157	648	Solanum habrochaites	9	3	60
117	PI 129686	Currant Tomato	Solanum subsect. lycopersicon hybr.	8	5	90
118	PI 133210	No Known Plant ID	Solanum subsect. lycopersicon spp.	8	2	27.6
119	PI 133542	No Known Plant ID	Solanum subsect. lycopersicon hybr.	8	2	45
120	PI 134417	No Known Plant ID	Solanum habrochaites	8	1	20
121	PI 134418	No Known Plant ID	Solanum habrochaites	8	4	80
122	PI 135022	No Known Plant ID	Solanum subsect. lycopersicon hybr.	9	5	100
123	PI 135842	Banjanirunu	Solanum subsect. lycopersicon hybr.	9	5	100
124	PI 143522	No Known Plant ID	Solanum subsect. lycopersicon hybr.	10	0.9	18
125	PI 143524	No Known Plant ID	Solanum pimpinellifolium	7	0.71	14.2
126	PI 143527	No Known Plant ID	Solanum pimpinellifolium	9	0	0
127	PI 143679	1	Solanum peruvianum	11	2	40
128	PI 143680	2	Solanum subsect. lycopersicon hybr.	8	3	60
129	PI 144955	39.1045	Solanum subsect. lycopersicon hybr.	9	3	60
130	PI 146089	Egyptian	Solanum subsect. lycopersicon hybr.	9	4	80
131	PI 147609	No Known Plant ID	Solanum subsect. lycopersicon hybr.	10	5	100
132	PI 147635	No Known Plant ID	Solanum subsect. lycopersicon hybr.	12	3	60
133	PI 152043	No Known Plant ID	Solanum subsect. lycopersicon hybr.	10	2	40
134	PI 155368	No Known Plant ID	Solanum subsect. lycopersicon hybr.	8	3	60
135	PI 155369	No Known Plant ID	Solanum subsect. lycopersicon hybr.	8	4	80
136	PI 155371	No Known Plant ID	Solanum subsect. lycopersicon hybr.	8	4	80
137	PI 155375	No Known Plant ID	Solanum subsect. lycopersicon hybr.	9	4	80
138	PI 155378	No Known Plant ID	Solanum subsect. lycopersicon hybr.	8	4	80
139	PI 155379	No Known Plant ID	Solanum subsect. lycopersicon hybr.	7	5	100
140	PI 158161	Tomate Chiquito	Solanum subsect. lycopersicon hybr.	9	5	100
141	PI 158164	Tomate Chiquito	Solanum subsect. lycopersicon hybr.	9	5	100
142	PI 158166	Tomate Cimmarron	Solanum subsect. lycopersicon hybr.	8	3	60
143	PI 158167	Tomate Cimmarron	Solanum subsect. lycopersicon hybr.	8	3	60
144	PI 159007	1155	Solanum subsect. lycopersicon hybr.	9	2	40
145	PI 163246	8276	Solanum subsect. lycopersicon hybr.	7	5	100
146	PI 180725	Large German Cherry	Solanum subsect. lycopersicon hybr.	8	5	100
147	PI 185688	1949-05-01	Solanum subsect. lycopersicon hybr.	9	5	100
148	PI 185689	1949-06-01	Solanum subsect. lycopersicon hybr.	4	4	80
149	PI 190188	1125	Solanum subsect. lycopersicon hybr.	6	4	80
150	PI 193422	No Known Plant ID	Solanum subsect. lycopersicon hybr.	9	4	80
151	PI 195003	9262	Solanum subsect. lycopersicon hybr.	8	4	80
152	PI 195322	2773	Solanum subsect. lycopersicon hybr.	8	4	80
153	PI 195324	2783	Solanum subsect. lycopersicon hybr.	9	4	80
154	PI 195325	2784	Solanum subsect. lycopersicon hybr.	8	3	60
155	PI 195781	2513	Solanum subsect. lycopersicon hybr.	9	4	80
156	PI 195788	2609	Solanum subsect. lycopersicon hybr.	10	4	80
157	PI 195789	2821	Solanum subsect. lycopersicon hybr.	6	5	100
158	PI 195790	2850	Solanum subsect. lycopersicon hybr.	9	5	100
159	PI 195791	2851	Solanum subsect. lycopersicon hybr.	9	5	100
160	PI 197159	3085	Solanum subsect. lycopersicon hybr.	11	5	100
161	PI 198674	Strain 907-W	Solanum subsect. lycopersicon hybr.	11	5	100
162	PI 198912	25	Solanum subsect. lycopersicon hybr.	8	5	100
163	PI 199380	No Known Plant ID	Solanum corneliomulleri	7	5	100
164	PI 204587	No. 155	Solanum subsect. lycopersicon hybr.	8	5	100
165	PI 204975	31	Solanum subsect. lycopersicon hybr.	11	5	100
166	PI 204976	West Virginia Accession 36	Solanum subsect. lycopersicon hybr.	9	5	100
167	PI 204978	45	Solanum subsect. lycopersicon hybr.	8	5	100
168	PI 204980	West Virginia Accession 106	Solanum subsect. lycopersicon hybr.	9	5	100
169	PI 204982	126-2	Solanum subsect. lycopersicon hybr.	7	1	20
170	PI 204987	171-1	Solanum subsect. lycopersicon hybr.	8	2	40
171	PI 204997	701	Solanum subsect. lycopersicon hybr.	10	4	80
172	PI 204998	702	Solanum subsect. lycopersicon hybr.	11	5	100
173	PI 204999	Stone	Solanum subsect. lycopersicon hybr.	10	5	100
174	PI 205001	707	Solanum subsect. lycopersicon hybr.	9	5	100
175	PI 205002	711	Solanum subsect. lycopersicon hybr.	11	5	100
176	PI 205009	775-1	Solanum pimpinellifolium	12	1	20
177	PI 205010	775-2	Solanum subsect. lycopersicon hybr.	9	2	40
178	PI 205011	795-1	Solanum subsect. lycopersicon hybr.	7	5	100
179	PI 205012	795-2	Solanum subsect. lycopersicon hybr.	5	1	20
180	PI 205013	809-1	Solanum subsect. lycopersicon hybr.	8	5	100
181	PI 205014	809-3	Solanum subsect. lycopersicon hybr.	8	5	100
182	PI 205015	819-1	Solanum subsect. lycopersicon hybr.	9	5	100
183	PI 205016	819-2	Solanum subsect. lycopersicon hybr.	9	5	100
184	PI 205017	828-1	Solanum subsect. lycopersicon hybr.	8	5	100
185	PI 205018	828-2	Solanum subsect. lycopersicon hybr.	10	5	100
186	PI 205019	846-1	Solanum subsect. lycopersicon hybr.	11	5	100
187	PI 205020	846-2	Solanum subsect. lycopersicon hybr.	9	5	100
188	PI 205021	878	Solanum subsect. lycopersicon hybr.	9	5	100
189	PI 205022	880	Solanum subsect. lycopersicon hybr.	8	5	100
190	PI 205026	887-1	Solanum subsect. lycopersicon hybr.	9	5	100
191	PI 205033	891-3	Solanum subsect. lycopersicon hybr.	9	5	100
192	PI 209975	Redondo	Solanum subsect. lycopersicon hybr.	10	5	100
193	PI 209978	No Known Plant ID	Solanum habrochaites	9	0	0
194	PI 211838	1	Solanum pimpinellifolium	10	0	0
195	PI 211839	2	Solanum pimpinellifolium	11	1	20
196	PI 211840	3	Solanum pimpinellifolium	9	1	20
197	PI 212407	Rick LA 102	Solanum peruvianum	8	1	20
198	PI 212408	Rick LA 125	Solanum pimpinellifolium	10	1	20
199	PI 212409	De Zerpa 52-118	Solanum pimpinellifolium	8	1	20
200	PI 212410	De Zerpa	Solanum subsect. lycopersicon hybr.	9	5	100
201	PI 212411	Burdick-038	Solanum subsect. lycopersicon hybr.	8	5	100
202	PI 222256	1435	Solanum subsect. lycopersicon hybr.	7	4	80
203	PI 223309	Pearson's P 723	Solanum subsect. lycopersicon hybr.	7	1	20
204	PI 224589	Wooster 491330	Solanum subsect. lycopersicon hybr.	5	1	20
205	PI 224675	X907W	Solanum subsect. lycopersicon hybr.	8	3	60
206	PI 224709	Col. No. 4	Solanum pimpinellifolium	8	1	20
207	PI 224710	Tomatillo	Solanum pimpinellifolium	9	3	60
208	PI 230327	No Known Plant ID	Solanum pimpinellifolium	9	0	0
209	PI 233930	No Known Plant ID	Solanum subsect. lycopersicon hybr.	8	0	0
210	PI 237640	52267-1-La166	Solanum subsect. lycopersicon hybr.	6	0.17	3.4
211	PI 246585	P-147	Solanum peruvianum	3	4	80
212	PI 246586	P-174	Solanum peruvianum	7	3	60
213	PI 247087	E-411	Solanum habrochaites	9	0	0
214	PI 249641	Pusa Red Plum	Solanum subsect. lycopersicon hybr.	8	3	60
215	PI 260402	M-10	Solanum subsect. lycopersicon hybr.	8	2	40
216	PI 263589	17856	Solanum pimpinellifolium	7	4	80
217	PI 266375	P789	Solanum peruvianum	8	2	40
218	PI 266376	P834	Solanum peruvianum	8	4	80
219	PI 269139	Rootstock K	Solanum subsect. lycopersicon hybr.	6	3	60
220	PI 269140	Rootstock KN	Solanum subsect. lycopersicon hybr.	9	3	60
221	PI 269141	Rootstock KV	Solanum subsect. lycopersicon hybr.	9	4	80
222	PI 269142	Rootstock KVF	Solanum subsect. lycopersicon hybr.	9	2	40
223	PI 270150	Jitomate	Solanum subsect. lycopersicon hybr.	9	4	80
224	PI 270436	1	Solanum subsect. lycopersicon hybr.	9	4	80
225	PI 270439	23	Solanum pimpinellifolium	9	2	40
226	PI 270440	24	Solanum pimpinellifolium	9	3	60
227	PI 270441	25	Solanum pimpinellifolium	9	4	80
228	PI 270442	26	Solanum pimpinellifolium	9	4	80
229	PI 270443	27	Solanum pimpinellifolium	9	4	80
230	PI 270444	28	Solanum pimpinellifolium	10	3	60
231	PI 270445	29	Solanum pimpinellifolium	8	3	60
232	PI 270446	30	Solanum pimpinellifolium	7	4	80
233	PI 270447	31	Solanum pimpinellifolium	7	4	80
234	PI 270448	32	Solanum pimpinellifolium	9	3	60
235	PI 270449	33	Solanum pimpinellifolium	7	3	60
236	PI 270450	34	Solanum pimpinellifolium	9	3	60
237	PI 270451	35	Solanum pimpinellifolium	8	3	60
238	PI 270452	36	Solanum pimpinellifolium	9	3	60
239	PI 270453	47	Solanum pimpinellifolium	7	3	60
240	PI 270454	49	Solanum subsect. lycopersicon hybr.	5	4	80
241	PI 274174	No Known Plant ID	Solanum pimpinellifolium	7	4	80
242	PI 279373	No Known Plant ID	Solanum pimpinellifolium	8	4	80
243	PI 289241	Tomatillo	Solanum subsect. lycopersicon hybr.	9	2	40
244	PI 298933	L.106	Solanum neorickii	8	4	80
245	PI 298934	L.470	Solanum subsect. lycopersicon hybr.	6	4	80
246	PI 298935	L.82	Solanum subsect. lycopersicon hybr.	8	4	80
247	PI 303662	No Known Plant ID	Solanum pimpinellifolium	9	5	100
248	PI 303813	Red Cherry	Solanum subsect. lycopersicon hybr.	10	5	100
249	PI 303814	4929	Solanum peruvianum	11	5	100
250	PI 304251	Loomis Potato Leaf Cherry	Solanum subsect. lycopersicon hybr.	9	5	100
251	PI 306216	No Known Plant ID	Solanum pimpinellifolium	12	1	20
252	PI 306811	Sel No. 128650-6y-IV-1-12	Solanum peruvianum	5	0.8	16
253	PI 306812	No Known Plant ID	Solanum subsect. lycopersicon hybr.	6	4	80
254	PI 306814	No Known Plant ID	Solanum subsect. lycopersicon hybr.	3	3	60
255	PI 308181	7160	Solanum peruvianum	5	5	100
256	PI 308182	UC 64.1410	Solanum habrochaites	3	1	20
257	PI 308183	5449	Solanum corneliomulleri	4	2	40
258	PI 309815	20669	Solanum subsect. lycopersicon hybr.	10	4	80
259	PI 309907	Tomatillo	Solanum pimpinellifolium	10	5	100
260	PI 312426	No Known Plant ID	Solanum subsect. lycopersicon hybr.	11	5	100
261	PI 319368	22152	Solanum subsect. lycopersicon hybr.	10	4	80
262	PI 319369	22280	Solanum subsect. lycopersicon hybr.	11	5	100
263	PI 325148	Cereza	Solanum subsect. lycopersicon hybr.	11	5	100
264	PI 325881	Susong Kalabaw	Solanum subsect. lycopersicon hybr.	10	5	100
265	PI 326173	No Known Plant ID	Solanum peruvianum	4	4	80
266	PI 339882	49	Solanum subsect. lycopersicon hybr.	10	5	100
267	PI 339883	50	Solanum subsect. lycopersicon hybr.	12	5	100
268	PI 340905	G-14565	Solanum pimpinellifolium	9	5	100
269	PI 344102	Red Currant 1149 K	Solanum pimpinellifolium	9	0	0
270	PI 344103	Utah 737	Solanum pimpinellifolium	9	0	0
271	PI 346340	Mo. 160	Solanum pimpinellifolium	7	0	0
272	PI 357249	Siten Domat	Solanum subsect. lycopersicon hybr.	10	5	100
273	PI 357263	Ceresoviden	Solanum subsect. lycopersicon hybr.	9	5	100
274	PI 358956	166	Solanum pimpinellifolium	4	4	80
275	PI 370072	V-6714	Solanum subsect. lycopersicon hybr.	9	4	80
276	PI 370075	V-6720	Solanum subsect. lycopersicon hybr.	10	5	100
277	PI 370093	HES	Solanum pimpinellifolium	3	1	20
278	PI 372361	3.2	Solanum subsect. lycopersicon hybr.	2	5	100
279	PI 372362	7	Solanum subsect. lycopersicon hybr.	10	2	32
280	PI 372363	9	Solanum subsect. lycopersicon hybr.	9	4	80
281	PI 375937	No Known Plant ID	Solanum pimpinellifolium	10	4	80
282	PI 390513	W-C 1054	Solanum habrochaites	8	2	30
283	PI 390514	W-C 1365	Solanum habrochaites	11	3	60
284	PI 390515	W-C 1412	Solanum habrochaites	13	3	80
285	PI 390517	W-C 1047	Solanum habrochaites	0	N/A	N/A
286	PI 390660	W-C 1305	Solanum habrochaites	1	1	20
287	PI 390664	W-C 1099	Solanum peruvianum	0	N/A	N/A
288	PI 390665	W-C 1106	Solanum peruvianum	4	1	20
289	PI 390666	W-C 1147	Solanum peruvianum	0	N/A	N/A
290	PI 390667	W-C 1148	Solanum peruvianum	1	0	0
291	PI 390668	W-C 1149	Solanum peruvianum	0	N/A	N/A
292	PI 390669	W-C 1150	Solanum peruvianum	2	2	40
293	PI 390670	W-C 1151	Solanum peruvianum	4	3	60
294	PI 390671	W-C 1152	Solanum peruvianum	1	0	0
295	PI 390672	W-C 1153	Solanum peruvianum	0	N/A	N/A
296	PI 390673	W-C 1160	Solanum peruvianum	0	N/A	N/A
297	PI 390676	W-C 1236	Solanum peruvianum	4	1	20
298	PI 390680	Huinco	Solanum peruvianum	0	N/A	N/A
299	PI 390681	Lomas de Camana	Solanum peruvianum	4	1	20
300	PI 390682	Los Anitos Barranca	Solanum peruvianum	0	N/A	N/A
301	PI 390684	Rio Churin	Solanum peruvianum	0	N/A	N/A
302	PI 390685	Huaral	Solanum peruvianum	0	N/A	N/A
303	PI 390688	W-C 1095	Solanum pimpinellifolium	9	4	80
304	PI 390689	W-C 1096	Solanum pimpinellifolium	9	1	20
305	PI 390690	W-C 1098	Solanum pimpinellifolium	10	1	20
306	PI 390691	W-C 1100	Solanum pimpinellifolium	10	2	30
307	PI 390692	W-C 1269	Solanum pimpinellifolium	12	0	0
308	PI 390693	W-C 1270	Solanum pimpinellifolium	12	0	0
309	PI 390694	W-C 1271	Solanum pimpinellifolium	7	0	0
310	PI 390695	W-C 1272	Solanum pimpinellifolium	3	0	0
311	PI 390696	W-C 1273	Solanum pimpinellifolium	4	2	40
312	PI 390697	W-C 1274	Solanum pimpinellifolium	5	4	80
313	PI 390698	W-C 1275	Solanum pimpinellifolium	7	0	0
314	PI 390699	W-C 1276	Solanum pimpinellifolium	10	0.9	18
315	PI 390700	W-C 1277	Solanum pimpinellifolium	3	0	0
316	PI 390701	W-C 1278	Solanum pimpinellifolium	3	1	20
317	PI 390702	W-C 1279	Solanum pimpinellifolium	7	0.57	11.4
318	PI 390703	W-C 1280	Solanum pimpinellifolium	8	3	60
319	PI 390704	W-C 1281	Solanum pimpinellifolium	11	2	40
320	PI 390705	W-C 1282	Solanum pimpinellifolium	9	3	60
321	PI 390706	W-C 1285	Solanum pimpinellifolium	7	1	20
322	PI 390707	W-C 1286	Solanum pimpinellifolium	1	4	80
323	PI 390708	W-C 1287	Solanum pimpinellifolium	1	3	60
324	PI 390709	W-C 1288	Solanum pimpinellifolium	12	1	20
325	PI 390710	W-C 1289	Solanum pimpinellifolium	3	0	0
326	PI 390711	W-C 1290	Solanum pimpinellifolium	10	3	48
327	PI 390712	W-C 1291	Solanum pimpinellifolium	12	0	0
328	PI 390713	W-C 1292	Solanum pimpinellifolium	9	0	0
329	PI 390714	W-C 1293	Solanum pimpinellifolium	11	0	0
330	PI 390715	W-C 1294	Solanum pimpinellifolium	1	1	20
331	PI 390716	W-C 1295	Solanum pimpinellifolium	9	0	0
332	PI 390717	W-C 1296	Solanum pimpinellifolium	10	0	0
333	PI 390718	W-C 1298	Solanum pimpinellifolium	6	2	40
334	PI 390719	W-C 1299	Solanum pimpinellifolium	4	3	60
335	PI 390720	W-C 1300	Solanum pimpinellifolium	12	0.42	8.4
336	PI 390721	W-C 1301	Solanum pimpinellifolium	12	2	30
337	PI 390722	W-C 1333	Solanum pimpinellifolium	6	0	0
338	PI 390723	W-C 1334	Solanum pimpinellifolium	5	0.8	16
339	PI 390724	W-C 1335	Solanum pimpinellifolium	4	0	0
340	PI 390725	W-C 1336	Solanum pimpinellifolium	6	0.17	3.4
341	PI 390726	W-C 1337	Solanum pimpinellifolium	11	0	0
342	PI 390727	W-C 1338	Solanum pimpinellifolium	7	0	0
343	PI 390729	W-C 1340	Solanum pimpinellifolium	3	3	53.4
344	PI 390730	W-C 1341	Solanum pimpinellifolium	2	3	50
345	PI 390731	W-C 1342	Solanum pimpinellifolium	11	4	80
346	PI 390732	W-C 1343	Solanum pimpinellifolium	5	2	40
347	PI 390733	W-C 1344	Solanum pimpinellifolium	6	2	40
348	PI 390734	W-C 1345	Solanum pimpinellifolium	6	2	40
349	PI 390735	W-C 1346	Solanum pimpinellifolium	15	2	40
350	PI 390736	W-C 1347	Solanum pimpinellifolium	0	N/A	N/A
351	PI 390737	W-C 1348	Solanum pimpinellifolium	15	1	20
352	PI 390738	W-C 1349	Solanum pimpinellifolium	12	2	40
353	PI 390739	W-C 1350	Solanum pimpinellifolium	12	3	60
354	PI 390741	W-C 1352	Solanum pimpinellifolium	12	3	60
355	PI 390742	W-C 1353	Solanum pimpinellifolium	12	2	36.6
356	PI 390743	W-C 1354	Solanum pimpinellifolium	13	2	40
357	PI 390745	W-C 1356	Solanum pimpinellifolium	5	3	60
358	PI 390746	W-C 1357	Solanum pimpinellifolium	8	2	40
359	PI 390747	W-C 1358	Solanum pimpinellifolium	8	2	40
360	PI 390749	W-C 1360	Solanum pimpinellifolium	12	1	20
361	PI 390750	W-C 1415	Solanum pimpinellifolium	6	0	0
362	PI 390751	W-C 1417	Solanum pimpinellifolium	0	N/A	N./A
363	PI 390752	W-C 1418	Solanum pimpinellifolium	7	2	40
364	PI 415127	Criolla de Quetzaltepeque	Solanum habrochaites	7	5	100
365	PI 422397	No Known Plant ID	Solanum pimpinellifolium	4	2	40
366	PI 432362	No Known Plant ID	Solanum pimpinellifolium	9	0.44	8.8
367	PI 432363	No Known Plant ID	Solanum pimpinellifolium	12	1	20
368	PI 438898	W-C 2378	Solanum pimpinellifolium	1	5	100
369	PI 452284	M-26605	Solanum pimpinellifolium	0	N/A	N/A
370	PI 458623	No Known Plant ID	Solanum pimpinellifolium	10	5	100
371	PI 473464	OCH 11606	Solanum pennellii	11	5	100
372	PI 487624	No Known Plant ID	Solanum subsect. lycopersicon hybr.	10	5	100
373	PI 487625	No Known Plant ID	Solanum pimpinellifolium	6	5	100
374	PI 568258	Pr8-5	Solanum subsect. lycopersicon hybr.	7	5	100
375	PI 629031	Banadura	Solanum subsect. lycopersicon spp.	10	5	100
376	PI 629032	Cirlavik	Solanum subsect. lycopersicon spp.	10	5	100
377	PI 634844	Jenkins Line No. 152	Solanum pimpinellifolium	9	5	100
378	PI 636300	Jenkins Line No. 1311	Solanum subsect. lycopersicon spp.	12	5	100
379	PI 636301	Jenkins Line No. 1504	Solanum subsect. lycopersicon spp.	12	4	80
380	PI 109834	Merville Des Marches	Solanum lycopersicum	0	N/A	N/A
381	PI 128586	422	Solanum lycopersicum	11	4	80
382	PI 129026	575	Solanum lycopersicum	9	5	100
383	PI 129033	609	Solanum lycopersicum	5	4	80
384	PI 129084	705	Solanum lycopersicum	2	5	100
385	PI 196297	2927	Solanum lycopersicum	10	4	80
386	PI 258474	LA 410	Solanum lycopersicum	8	5	100
387	PI 258478	LA 394	Solanum lycopersicum	10	1	20
388	PI 390510	W-C 1050	Solanum lycopersicum var. cerasiforme	8	2	40
389	PI 647523	VFNT Cherry	Solanum lycopersicum	2	3	50
390	PI 647556	AVRDC #6	Solanum lycopersicum	8	2	40
Disease severity index
0= no symptoms
1: mild mosaic
2: mosaic
3: mosaic, leaf deformed
4: severe mosaic, leaf deformed, mottling
5: severe mosaic, leaf deformed, mottling, string leaves
S=Susceptible
R=Resistant
N/A: data not available due to no germination
	Date of inoculation : March 2, 2020
	Sample collection and symptom rating : March 23, 2020
	14 missing lines due to no germination
	390-14=376 lines evaluated from USDA PIs
