# Supplementary material for: Evaluation of Tomato Germplasm against Tomato Brown Rugose Fruit Virus and Identification of Resistance in Solanum pimpinellifolium
Source: Preprints.org preprint supplement (doi:10.20944/preprints202401.0785.v1), 2024-01-10
Supplement: Supplementary file 2 [file Supplementary Table S1_ToBRFV_ TGRC germplasm.xlsx]

## Sheet: Table S1_LA.line
Supplementary Table S1. Screening the tomato core germplasm collections at TGRC for their resistence to ToBRFV
Sample No.	Accession	Taxon	Country of origin	Number of plants screened	Severity rating class (1/7/20)	Disease severity index (%)	(ELISA (OD405nm)
1	LA0107	S. corneliomulleri	Hacienda San Isidro, Rio Canete, Lima, Peru	8	3	60	0.912
2	LA0121	S. pimpinellifolium	Trujillo, La Libertad, Peru	9	3	60	0.859
3	LA0153	S. peruvianum	Culebras, Ancash, Peru	9	3	60	1.0896
4	LA0361	S. habrochaites	Canta, Lima, Peru	3	3	60	0.5258
5	LA0373	S. pimpinellifolium	Culebras #1, Ancash, Peru	9	4	80	1.1973
6	LA0407	S. habrochaites	El Mirador, Guayaquil, Guayas, Ecuador	9	4	80	0.6868
7	LA0441	S. arcanum	Cerro Campana, La Libertad, Peru	9	4	80	0.8477
8	LA0444	S. corneliomulleri	Chincha #1, Ica, Peru	9	3	60	0.7473
9	LA0453	S. peruvianum	Yura #2, Arequipa, Peru	1	5	100	0.7271
10	LA0455	S. peruvianum	Rio Tambo, Arequipa, Peru	9	4	80	0.9328
11	LA1032	S. arcanum	Aricapampa, La Libertad, Peru	9	5	100	0.9117
12	LA1223	S. habrochaites	Alausi, Chimborazo, Ecuador	9	4	80	0.7237
13	LA1266	S. habrochaites	Pallatanga, Chimborazo, Ecuador	9	5	100	0.5762
14	LA1292	S. corneliomulleri	San Mateo, Lima, Peru	6	1	20	0.7465
15	LA1305	S. corneliomulleri	Ticrapo, Huancavelica, Peru	6	5	100	0.6561
16	LA1331	S. corneliomulleri	Nazca, Ica, Peru	1	1	20	0.7703
17	LA1347	S. habrochaites	Empalme Otusco, La Libertad, Peru	9	4	80	0.7885
18	LA1353	S. habrochaites	Contumaza, Cajamarca, Peru	5	4	80	0.6771
19	LA1358	S. huaylasense	Yautan, Ancash, Peru	4	5	100	0.7815
20	LA1361	S. habrochaites	Pariacoto, Ancash, Peru	8	2	40	0.6458
21	LA1364	S. huaylasense	Alta Fortaleza, Ancash, Peru	8	5	100	1.3731
22	LA1379	S. corneliomulleri	Caujul, Lima, Peru	12	5	100	0.7896
23	LA1393	S. habrochaites	Huaraz - Caraz, Ancash, Peru	11	2	40	0.7643
24	LA1395	S. arcanum	Chachapoyas, Amazonas, Peru	11	5	100	0.6041
25	LA1474	S. peruvianum	Lomas de Camana, Arequipa, Peru	5	5	100	0.606
26	LA1560	S. habrochaites	Matucana, Lima, Peru	9	4	80	0.6521
27	LA1582	S. pimpinellifolium	Motupe, Lambayeque, Peru	9	4	80	0.6939
28	LA1624	S. habrochaites	Jipijapa, Manabi, Ecuador	9	5	100	0.6029
29	LA1626	S. arcanum	Mouth of Rio Rupac, Ancash, Peru	6	3	60	0.8172
30	LA1690	S. pimpinellifolium	Castilla #2, Piura, Peru	9	4	80	2.0168
31	LA1691	S. habrochaites	Yauyos, Lima, Peru	0	N/A	N/A	N/A
32	LA1718	S. habrochaites	Huancabamba, Piura, Peru	5	2	40	0.615
33	LA1721	S. habrochaites	Ticrapo Viejo, Huancavelica, Peru	5	2	40	0.8128
34	LA1753	S. habrochaites	Surco, Lima, Peru	9	2	40	0.7749
35	LA1777	S. habrochaites	Rio Casma, Ancash, Peru	9	2	40	0.5784
36	LA1910	S. corneliomulleri	Tambillo, Huancavelica, Peru	1	5	100	0.8319
37	LA1918	S. habrochaites	Llauta, Ayacucho, Peru	9	2	40	0.9653
38	LA1928	S. habrochaites	Ocana, Ayacucho, Peru	9	3	60	0.6124
39	LA1929	S. peruvianum	La Yapana, Ica, Peru	5	4	80	1.0504
40	LA1937	S. corneliomulleri	Quebrada Torrecillas, Arequipa, Peru	2	2	40	1.0705
41	LA1938	S. chilense	Quebrada Salsipuedes, Arequipa, Peru	10	2	40	0.89193
42	LA1945	S. corneliomulleri	Caraveli, Arequipa, Peru	0	N/A	N/A	N/A
43	LA1951	S. peruvianum	Ocona, Arequipa, Peru	8	4	80	0.6817
44	LA1959	S. chilense	Huaico Moquegua, Moquegua, Peru	6	5	100	0.8868
45	LA1960	S. chilense	Rio Osmore, Moquegua, Peru	9	5	100	0.8977
46	LA1963	S. chilense	Rio Caplina, Tacna, Peru	7	3	60	1.2481
47	LA1965	S. chilense	Causuri, Tacna, Peru	6	3	60	0.6428
48	LA1969	S. chilense	Estique Pampa, Tacna, Peru	6	3	60	0.8611
49	LA1971	S. chilense	Palquilla, Tacna, Peru	6	4	80	0.9605
50	LA1972	S. chilense	Rio Sama, Tacna, Peru	1	3	60	0.7464
51	LA1984	S. arcanum	Otuzco, La Libertad, Peru	9	4	80	0.7424
52	LA2098	S. habrochaites	Sabiango, Loja, Ecuador	9	4	80	0.6838
53	LA2107	S. habrochaites	Los Lirios, Loja, Ecuador	9	0	0	0.5573
54	LA2109	S. habrochaites	Yangana #1, Loja, Ecuador	9	2	40	0.8843
55	LA2119	S. habrochaites	Saraguro, Loja, Ecuador	8	5	100	0.6744
56	LA2128	S. habrochaites	Zumbi, Zamora-Chinchipe, Ecuador	8	4	80	0.6956
57	LA2151	S. arcanum	Morochupa, Cajamarca, Peru	9	5	100	0.9573
58	LA2155	S. habrochaites	Maydasbamba, Cajamarca, Peru	9	4	80	0.5855
59	LA2156	S. habrochaites	Ingenio Montan, Cajamarca, Peru	9	4	80	0.6244
60	LA2157	S. arcanum	Tunel Chotano, Cajamarca, Peru	10	5	100	0.9595
61	LA2158	S. habrochaites	Rio Chotano, Cajamarca, Peru	9	3	60	0.5472
62	LA2163	S. arcanum	Cochabamba to Yamaluc, Cajamarca, Peru	8	3	60	0.8535
63	LA2167	S. habrochaites	Cementerio Cajamarca, Cajamarca, Peru	8	2	40	0.6285
64	LA2174	S. habrochaites	Rio Chinchipe, San Augustin, Cajamarca, Peru	9	3	60	0.7122
65	LA2185	S. arcanum	Pongo de Rentema, Amazonas, Peru	9	2	40	0.6592
66	LA2204	S. habrochaites	Balsapata, Amazonas, Peru	9	2	40	0.4177
67	LA2329	S. habrochaites	Aricapampa, La Libertad, Peru	10	2	40	0.5216
68	LA2409	S. habrochaites	Rio Miraflores, Lima, Peru	9	3	60	1.1439
69	LA2561	S. huaylasense	Huallanca, Ancash, Peru	9	3	60	1.2177
70	LA2650	S. habrochaites	Ayabaca, Piura, Peru	5	1	20	1.1951
71	LA2732	S. peruvianum	Moquella, Tarapaca, Chile	9	3	60	1.2076
72	LA2744	S. peruvianum	Sobraya, Arica and Parinacota, Chile	9	5	100	1.6869
73	LA2748	S. chilense	Soledad, Tarapaca, Chile	3	4	80	1.1908
74	LA2755	S. chilense	Banos de Chusmisa, Tarapaca, Chile	6	4	80	1.3856
75	LA2759	S. chilense	Mamina, Tarapaca, Chile	8	4	80	1.2832
76	LA2767	S. chilense	Chitita, Arica and Parinacota, Chile	2	1	20	1.16045
77	LA2773	S. chilense	Zapahuira, Arica and Parinacota, Chile	7	3	60	1.4402
78	LA2778	S. chilense	Chapiquina, Arica and Parinacota, Chile	2	4	80	1.3377
79	LA2860	S. habrochaites	Cariamanga, Loja, Ecuador	9	2	40	1.1739
80	LA2864	S. habrochaites	Sozorango, Loja, Ecuador	9	2	40	0.917
81	LA2879	S. chilense	Peine, Antofagasta, Chile	2	1	20	1.3229
82	LA2884	S. chilense	Ayaviri, Antofagasta, Chile	4	4	80	1.1958
83	LA2931	S. chilense	Guatacondo, Tarapaca, Chile	7	1	20	1.2861
84	LA2964	S. peruvianum	Quebrada de Burros, Tacna, Peru	7	3	60	1.1277
85	LA2981B	S. corneliomulleri	Torata, Moquegua, Peru	0	N/A	N/A	N/A
86	LA3219	S. corneliomulleri	Catarindo, Arequipa, Peru	9	3	60	1.8937
Table: Evaluation of resistance in TGRC tomato germplasm against ToBRFV
No. of lines received: 86 accessions. Three lines did not germinate, thus only 83 LA lines tested.
No. of line showed no symptom with low absorbence value in an ELISA test (0.5573): 1 S. habrochites (LA2107)
No. of line with susceptibility: 82
Date of inoculation: 11/20/2019 (1st)
Date of inoculation: 11/27/2019 (2nd)
1st symptom reading : 5 weeks after inoculation
2nd symptom reading : 8 weeks after inoculation ( Samples taken for serological test for the presence of toBRFV with TMV antibody, Agdia.
S: Susceptible, including segregation
R: resistant
N/A: data not available due to no germination
	Positive -ToBRFV	2.2248
	Healthy	0.1043
